# Supplementary material for: Mir-20a-5p induced WTX deficiency promotes gastric cancer progressions through regulating PI3K/AKT signaling pathway
Source: Springer Nature journal article supplement (doi:10.1186/s13046-020-01718-4), 2020-10-08

A

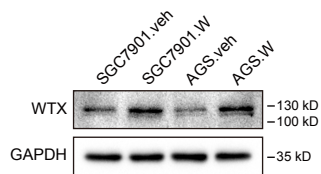

B

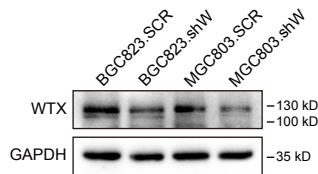

C

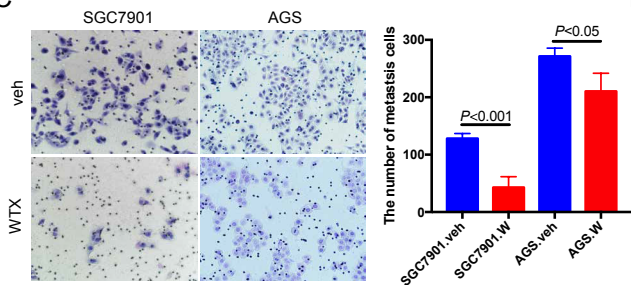

D

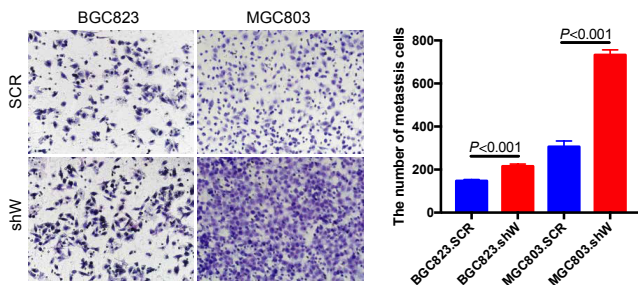

E

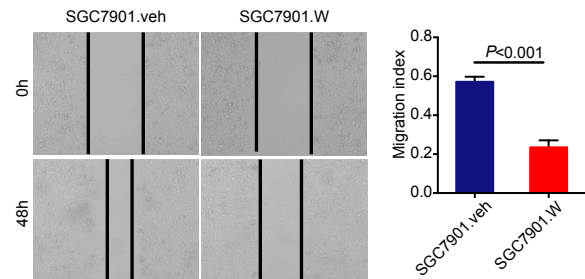

F

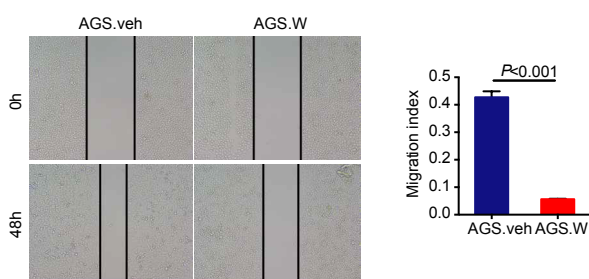

G

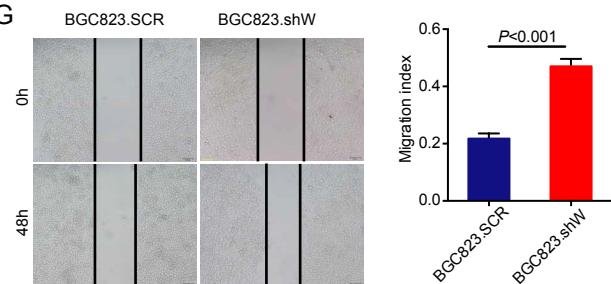

H

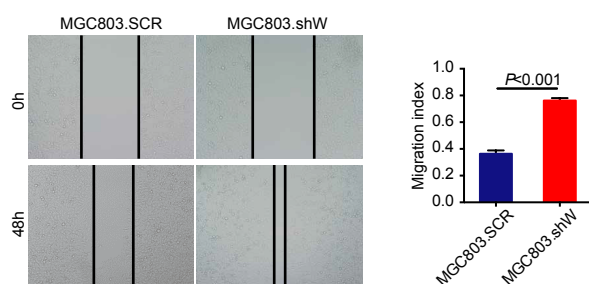

I

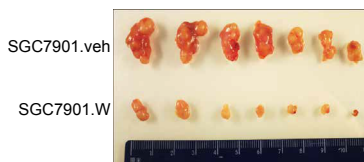

J

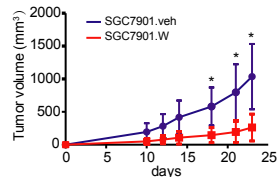

K

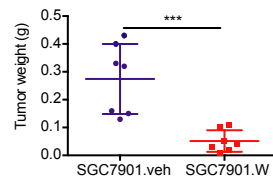

Supplement: MOESM1 [file 18463682]
