# Supplementary material for: Mir-20a-5p induced WTX deficiency promotes gastric cancer progressions through regulating PI3K/AKT signaling pathway
Source: Springer Nature journal article supplement (doi:10.1186/s13046-020-01718-4), 2020-10-08

A

## KEGG pathway enrichment (AGS.W vs AGS.veh)

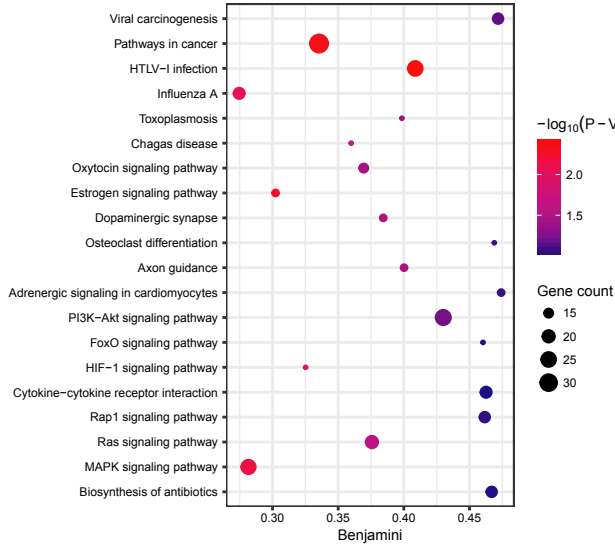

C

## KEGG pathway enrichment (GSE34715)

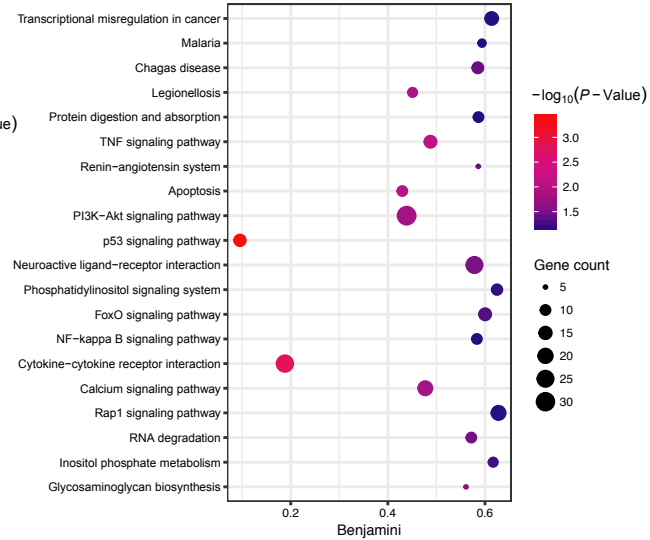

B

## KEGG pathway enrichment (GSE34715)

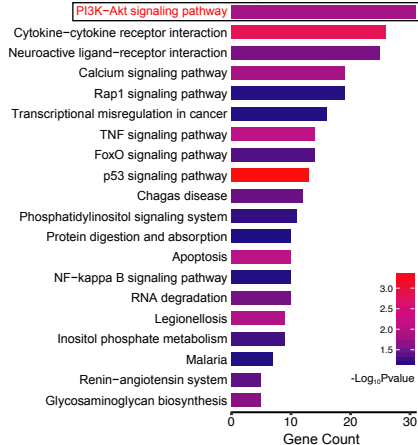

Supplement: MOESM2 [file 18463682]
